# Supplementary material
Source: MDPI journal article supplement (https://www.mdpi.com/1424-8220/10/11/9872)
Supplement: s1 [file s1]

Correction

**Correction: Baker, P. *et al.* Electrochemical Aptasensor for Endocrine Disrupting 17 $\beta$ -Estradiol Based on a Poly(3,4-ethylenedioxythiophene)-Gold Nanocomposite Platform. *Sensors* 2010, 10, 9872-9890**

**Rasaq A. Olowu, Omotayo Arotiba, Stephen N. Mailu, Tesfaye T. Waryo, Priscilla Baker \* and Emmanuel Iwuoha**

Sensor Lab, Department of Chemistry, University of the Western Cape, Bellville, 7535, South Africa; E-Mails: rolowu@uwc.ac.za (R.A.O.); oarotiba@uwc.ac.za (O.A.); 2970836@uwc.ac.za (S.N.M.); twaryo@uwc.ac.za (T.T.W.); eiwuoha@uwc.ac.za (E.I.)

\* Author to whom correspondence should be addressed; E-Mail: pbaker@uwc.ac.za; Tel.: +27-21-959-3051; Fax: +27-21-959-3055.

Received: 1 February 2011 / Published: 15 February 2011

Herewith please find corrected structures for Figure 8 in our paper published in *Sensors* in 2010 [1]. The structure for **17 $\alpha$ -ethynylestradiol** used for the analysis is shown below:

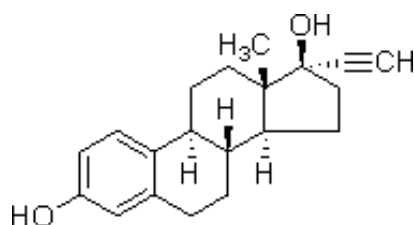

With product number E4876-1G from sigma Aldrich.

The corrected structure of **naphthalene** is below with no double bond in between carbon 2 and 7.

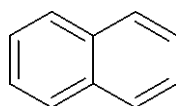

## References

1. Olowu, R.A.; Arotiba, O.; Mailu, S.N.; Waryo, T.T.; Baker, P.; Iwuoha, E. Electrochemical Aptasensor for Endocrine Disrupting  $17\beta$ -Estradiol Based on a Poly(3,4-ethylenedioxythiophene)-Gold Nanocomposite Platform. *Sensors* **2010**, *10*, 9872-9890.

© 2011 by the authors; licensee MDPI, Basel, Switzerland. This article is an open access article distributed under the terms and conditions of the Creative Commons Attribution license (<http://creativecommons.org/licenses/by/3.0/>).
